# Supplementary material for: Enhancing HIV testing yield in southern Mozambique: the effect of a Ministry of Health training module in targeted provider-initiated testing and counselling
Source: bioRxiv or medRxiv preprint supplement (doi:10.1101/2023.09.25.23296036), 2023-09-26
Supplement: Supplementary file [file media-3.pdf]

**Supplementary Table 1. Factors associated with HIV test positivity. Adjusted odds ratios from logistic regression analyses by sex.**

|                                         |                                   | Men (n=1471) <sup>a</sup> |             |              | Women (n=2422) <sup>a</sup> |            |                  |
|-----------------------------------------|-----------------------------------|---------------------------|-------------|--------------|-----------------------------|------------|------------------|
|                                         |                                   | aOR <sup>a</sup>          | 95% CI      | P-value      | aOR <sup>a</sup>            | 95% CI     | P-value          |
| <b>Sociodemographic variables</b>       |                                   |                           |             |              |                             |            |                  |
| <b>Age group (in years)<sup>b</sup></b> |                                   |                           |             |              |                             |            |                  |
|                                         | <b>15-19</b>                      | Ref.                      |             |              | Ref.                        |            |                  |
|                                         | <b>20-24</b>                      | 3.00                      | 0.36-24.68  | 0.307        | 1.52                        | 0.81-2.84  | 0.187            |
|                                         | <b>25-49</b>                      | 13.61                     | 1.72-107.66 | <b>0.013</b> | 1.59                        | 0.85-2.98  | 0.147            |
|                                         | <b>≥50</b>                        | 4.66                      | 0.55-39.35  | 0.158        | 0.43                        | 0.18-1.04  | 0.061            |
| <b>Health facility<sup>b</sup></b>      |                                   |                           |             |              |                             |            |                  |
|                                         | <b>Manhiça district hospital</b>  | Ref.                      |             |              | Ref.                        |            |                  |
|                                         | <b>Xinavane rural hospital</b>    | 0.82                      | 0.52-1.30   | 0.404        | 0.41                        | 0.27-0.61  | <b>&lt;0.001</b> |
|                                         | <b>Palmeira health unit</b>       | 0.64                      | 0.33-1.25   | 0.191        | 0.52                        | 0.32-0.83  | <b>0.007</b>     |
|                                         | <b>Maragra health unit</b>        | 0.51                      | 0.26-1.02   | 0.057        | 0.27                        | 0.16-0.48  | <b>&lt;0.001</b> |
| <b>Occupation<sup>b</sup></b>           |                                   |                           |             |              |                             |            |                  |
|                                         | <b>Farmer</b>                     | Ref.                      |             |              | Ref.                        |            |                  |
|                                         | <b>Industry/Miner</b>             | 3.81                      | 1.55-9.34   | <b>0.003</b> | 7.66                        | 0.62-94.05 | 0.112            |
|                                         | <b>Own or employer's business</b> | 0.98                      | 0.57-1.67   | 0.935        | 1.75                        | 0.98-3.11  | 0.057            |
|                                         | <b>Street vendor</b>              | 0.42                      | 0.52-3.47   | 0.424        | 1.35                        | 0.64-2.84  | 0.425            |
|                                         | <b>Student</b>                    | 0.29                      | 0.04-2.37   | 0.247        | 0.69                        | 0.34-1.39  | 0.298            |
|                                         | <b>Construction-related work</b>  | 1.03                      | 0.57-1.84   | 0.928        | 5.10                        | 0.91-28.47 | 0.063            |
|                                         | <b>State worker</b>               | 0.52                      | 0.23-1.18   | 0.117        | 0.42                        | 0.10-1.82  | 0.247            |
|                                         | <b>Unemployed</b>                 | 0.91                      | 0.54-1.55   | 0.729        | 1.29                        | 0.86-1.92  | 0.217            |
|                                         | <b>Other</b>                      | 0.85                      | 0.34-2.10   | 0.720        | 1.45                        | 0.61-3.46  | 0.402            |

| Risk factors                                             |                           |      |            |        |      |           |        |
|----------------------------------------------------------|---------------------------|------|------------|--------|------|-----------|--------|
| HIV-positive partner                                     |                           |      |            |        |      |           |        |
|                                                          | No                        | Ref. |            |        | Ref. |           |        |
|                                                          | Yes                       | 6.48 | 3.75-11.18 | <0.001 | 4.12 | 2.52-6.74 | <0.001 |
| Don't know (The partner never told him/her) <sup>b</sup> |                           | 2.69 | 1.65-4.38  | <0.001 | 2.80 | 2.00-3.92 | <0.001 |
| More than one sexual partner in the past year            |                           |      |            |        |      |           |        |
|                                                          | No                        | Ref. |            |        | Ref. |           |        |
|                                                          | Yes                       | 1.65 | 1.04-2.64  | 0.034  | 2.21 | 1.10-4.43 | 0.026  |
| Condom use                                               |                           |      |            |        |      |           |        |
|                                                          | Always                    | Ref. |            |        | Ref. |           |        |
|                                                          | Frequently <sup>c</sup>   | 1.81 | 0.78-4.21  | 0.171  | 1.27 | 0.55-2.95 | 0.577  |
|                                                          | Occasionally <sup>c</sup> | 1.46 | 0.75-2.83  | 0.261  | 1.86 | 0.89-3.90 | 0.099  |
|                                                          | Never                     | 1.77 | 0.92-3.42  | 0.089  | 2.30 | 1.11-4.79 | 0.026  |
| Visited a healer in the previous 6 months <sup>b</sup>   |                           |      |            |        |      |           |        |
|                                                          | No                        | Ref. |            |        | Ref. |           |        |
|                                                          | Yes                       | 2.10 | 0.95-4.63  | 0.066  | 1.59 | 0.76-3.31 | 0.217  |
| Other factors                                            |                           |      |            |        |      |           |        |
| Health department <sup>b</sup>                           |                           |      |            |        |      |           |        |
|                                                          | Triage                    | Ref. |            |        | Ref. |           |        |
|                                                          | Emergency                 | 1.50 | 0.76-2.94  | 0.239  | 2.23 | 1.23-4.05 | 0.008  |
| Pregnant or partner of pregnant woman <sup>b</sup>       |                           |      |            |        |      |           |        |
|                                                          | No                        | Ref. |            |        | Ref. |           |        |

|                                        |                   |      |            |              |      |            |              |
|----------------------------------------|-------------------|------|------------|--------------|------|------------|--------------|
|                                        | <b>Yes</b>        | 1.50 | 0.82-2.73  | 0.187        | 1.52 | 0.46-5.05  | 0.492        |
|                                        | <b>Don't know</b> | 2.82 | 0.50-15.90 | 0.239        | 2.23 | 1.01-4.94  | <b>0.048</b> |
| <b>Signs and symptoms</b>              |                   |      |            |              |      |            |              |
| <b>Skin or oral mucosa lesions</b>     |                   |      |            |              |      |            |              |
|                                        | <b>No</b>         | Ref. |            |              | Ref. |            |              |
|                                        | <b>Yes</b>        | 3.54 | 1.50-8.35  | <b>0.004</b> | 4.11 | 1.78-9.51  | <b>0.001</b> |
| <b>Cough for over 3 weeks</b>          |                   |      |            |              |      |            |              |
|                                        | <b>No</b>         | Ref. |            |              | Ref. |            |              |
|                                        | <b>Yes</b>        | 1.29 | 0.44- 3.79 | 0.641        | 2.04 | 0.97-4.29  | 0.061        |
| <b>Night sweats<sup>b, d</sup></b>     |                   |      |            |              |      |            |              |
|                                        | <b>No</b>         | Ref. |            |              |      |            |              |
|                                        | <b>Yes</b>        | 8.25 | 1.15-59.47 | <b>0.036</b> |      |            |              |
| <b>Constitutional syndrome</b>         |                   |      |            |              |      |            |              |
| <b>(asthenia anorexia weight loss)</b> |                   |      |            |              |      |            |              |
|                                        | <b>No</b>         | Ref. |            |              | Ref. |            |              |
|                                        | <b>Yes</b>        | 2.07 | 0.66-6.45  | 0.211        | 2.94 | 0.44-19.80 | 0.268        |

<sup>a</sup> Client participants tested for HIV in both observation phases. 14 individuals with an undetermined HIV test result were excluded. For the multivariable analysis, 1471 men and 2422 were included, respectively.

<sup>b</sup> Sociodemographic characteristics, risk factors or signs and symptoms not included in the national targeted PITC algorithm of Mozambique.

<sup>c</sup> Occasionally: less than half of the times; Frequently: more than half of the times

<sup>d</sup> The aOR among women could not be estimated because there was not any woman included in the multivariable analysis who presented with night sweats.

Abbreviations: aOR: adjusted odds ratio, CI: confidence interval, PITC: provider-initiated testing and counselling, Ref.: reference category
